# Supplementary material for: QM/MM modelling of oleamide hydrolysis in fatty acid amide hydrolase (FAAH) reveals a new mechanism of nucleophile activation
Source: Royal Society of Chemistry journal article supplement (doi:10.1039/b503887a), 2005-01-01
Supplement: b503887a.pdf [file b503887a.pdf]

## Electronic Supplementary Information

CHARMM all atom force field employs a Lennard-Jones (6-12) function to describe Van der Waals interactions. This potential is a combination of attractive and repulsive contributions. The repulsive term describes internuclear electrostatic repulsion and short-range repulsive forces (or exchange forces) between electrons with the same spin. The attractive term is due to dispersion forces, which in turn are due to instantaneous dipoles arising during the fluctuations in the electron clouds. The form of the potential energy function of two interacting atoms is:

$$V_{vdW} = 4e \left[ \left( \frac{s}{r} \right)^{12} - \left( \frac{s}{r} \right)^6 \right]$$

Where  $r$  is the distance between the two atoms,  $s$  is the collision diameter (the distance at the zero energy) and  $e$  is the Lennard-Jones well depth. For a  $q$  atom and a  $c$  atom, these empirical parameters are expressed from the Lorentz-Berthelot mixing rules:

$$s_{qc} = \frac{1}{2} (s_{qq} + s_{cc})$$

$$e_{qc} = \sqrt{e_{qq} e_{cc}}$$

Van der Waals interactions are also important to well describe the interaction between QM and MM regions in hybrid QM/MM enzyme simulation. The Van der Waals parameters relative to the QM atoms of the FAAH-oleamide complex, applied in all the simulations performed, are reported in the table below. These are consistent to those reported in the combined parameter file (CHARMM22 for protein, CHARMM27 for lipid) par\_all27\_prot\_lipid.prm.

For further details see [www.charmm.org](http://www.charmm.org)

| ATOM NAME | ATOM TYPE | e (kcal mole <sup>-1</sup> ) | s (Å)    | Notes     |
|-----------|-----------|------------------------------|----------|-----------|
| O1        | O         | -0.120000                    | 1.700000 | Oleamide  |
| C1        | CC        | -0.070000                    | 2.000000 | Oleamide  |
| N2        | NH2       | -0.200000                    | 1.850000 | Oleamide  |
| H         | H         | -0.046000                    | 0.224500 | Oleamide  |
| H1        | H         | -0.046000                    | 0.224500 | Oleamide  |
| C18       | CTL2      | -0.056000                    | 2.010000 | Oleamide  |
| C2        | CTL2      | -0.056000                    | 2.010000 | Oleamide  |
| C3        | CTL2      | -0.056000                    | 2.010000 | Oleamide  |
| H6        | HAL2      | -0.028000                    | 1.340000 | Oleamide  |
| H7        | HAL2      | -0.028000                    | 1.340000 | Oleamide  |
| H4        | HAL2      | -0.028000                    | 1.340000 | Oleamide  |
| H5        | HAL2      | -0.028000                    | 1.340000 | Oleamide  |
| H2        | HAL2      | -0.028000                    | 1.340000 | Oleamide  |
| H3        | HAL2      | -0.028000                    | 1.340000 | Oleamide  |
| CB        | CT2       | -0.055000                    | 2.175000 | Ser217    |
| HB1       | HA        | -0.022000                    | 1.320000 | Ser217    |
| HB2       | HA        | -0.022000                    | 1.320000 | Ser217    |
| OG        | OH1       | -0.152100                    | 1.770000 | Ser217    |
| HG1       | H         | -0.046000                    | 0.224500 | Ser217    |
| CE        | CT2       | -0.055000                    | 2.175000 | Lys142    |
| HE1       | HA        | -0.022000                    | 1.320000 | Lys142    |
| HE2       | HA        | -0.022000                    | 1.320000 | Lys142    |
| NZ        | NH2       | -0.200000                    | 1.850000 | Lys142    |
| HZ1       | HC        | -0.046000                    | 0.224500 | Lys142    |
| HZ2       | HC        | -0.046000                    | 0.224500 | Lys142    |
| CB'       | CT2       | -0.055000                    | 2.175000 | Ser241    |
| HB1'      | HA        | -0.022000                    | 1.320000 | Ser241    |
| HB2'      | HA        | -0.022000                    | 1.320000 | Ser241    |
| OG'       | OH1       | -0.152100                    | 1.770000 | Ser241    |
| HG1'      | H         | -0.046000                    | 0.224500 | Ser241    |
| HQL1      | HQ        | -                            | -        | Link atom |
| HQS1      | HQ        | -                            | -        | Link atom |
| HQS2      | HQ        | -                            | -        | Link atom |
| HQM1      | HQ        | -                            | -        | Link atom |
